# Supplementary material
Source: Springer Nature journal article supplement (https://www.springermedizin.de/resource/supplementary/12879_2008_884_MOESM5_ESM.pdf/9449562)

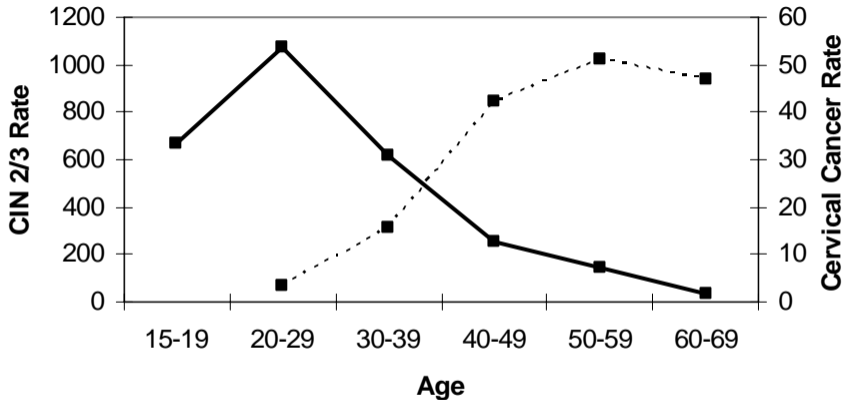

—■— CIN 2/3    - - - ■ - - - Cervical Cancer

Supplement: MOESM5 [file 9449562]
